19 **Abstract**

20 **Background:** The diagnosis of rare genetic diseases is often challenging due to the  
21 complexity of the genetic underpinnings of these conditions and the limited availability  
22 of diagnostic tools. Machine learning (ML) algorithms have the potential to improve the  
23 accuracy and speed of diagnosis by analyzing large amounts of genomic data and  
24 identifying complex multiallelic patterns that may be associated with specific diseases.  
25 In this systematic review, we aimed to identify the methodological trends and the ML  
26 application areas in rare genetic diseases.

27 **Methods:** We performed a systematic review of the literature following the PRISMA  
28 guidelines to search studies that used ML approaches to enhance the diagnosis of rare  
29 genetic diseases. Studies that used DNA-based sequencing data and a variety of ML  
30 algorithms were included, summarized, and analyzed using bibliometric methods,  
31 visualization tools, and a feature co-occurrence analysis.

32 **Findings:** Our search identified 22 studies that met the inclusion criteria. We found that  
33 exome sequencing was the most frequently used sequencing technology (59%), and rare  
34 neoplastic diseases were the most prevalent disease scenario (59%). In rare neoplasms,  
35 the most frequent applications of ML models were the differential diagnosis or  
36 stratification of patients (38.5%) and the identification of somatic mutations (30.8%). In  
37 other rare diseases, the most frequent goals were the prioritization of rare variants or  
38 genes (55.5%) and the identification of biallelic or digenic inheritance (33.3%). The  
39 most employed method was the random forest algorithm (54.5%). In addition, the  
40 features of the datasets needed for training these algorithms were distinctive depending  
41 on the goal pursued, including the mutational load in each gene for the differential  
42 diagnosis of patients, or the combination of genotype features and sequence-derived  
43 features (such as GC-content) for the identification of somatic mutations.

44 **Conclusions:** ML algorithms based on sequencing data are mainly used for the  
45 diagnosis of rare neoplastic diseases, with random forest being the most common  
46 approach. We identified key features in the datasets used for training these ML models  
47 according to the objective pursued. These features can support the development of  
48 future ML models in the diagnosis of rare genetic diseases.

49 **Keywords:** artificial intelligence, rare diseases, precision medicine, rare variants, DNA-  
50 sequencing, genomics

## 51        **1. Introduction**

52        Rare diseases (RDs) continue to be a challenge to the healthcare system due to the  
53        difficulty of reaching an accurate diagnosis. Although there is no uniform international  
54        criteria, RDs are usually defined as those affecting fewer than 4-5 cases out of 10,000  
55        individuals<sup>1</sup>. Considering them as a whole, RDs can be regarded as a common event,  
56        with 7,241 different RDs ([http://www.orphadata.org/data/xml/en\\_product7.xml](http://www.orphadata.org/data/xml/en_product7.xml),  
57        updated on June 14, 2022) with an estimated accumulated prevalence of 3.5–5.9% and  
58        affecting more than 400 million people worldwide<sup>2,3</sup>.

59        Most RDs appear to be caused or modified by genetic factors; up to 80% of them are  
60        thought to have a genetic etiology<sup>4</sup>. Our current knowledge on this aspect is limited,  
61        existing 3,886 RDs (53.7%) linked to, at least, a gene that cause or modify the disease  
62        phenotype ([http://www.orphadata.org/data/xml/en\\_product6.xml](http://www.orphadata.org/data/xml/en_product6.xml), updated on 14 Jun  
63        22)<sup>2</sup>. The improved performance and the price reduction of Next-generation sequencing  
64        (NGS) technologies in recent years have made them more attractive for clinical  
65        applications in RDs, increasing rapidly the number of phenotype-genotype  
66        associations<sup>5</sup>. This has resulted in an accurate molecular diagnosis in many patients  
67        suffering from monogenic RDs, which has occasionally led to personalized treatments  
68        and improved disease management. Nevertheless, other patients with more complex  
69        disorders receive an inconclusive genetic diagnosis, placing the diagnostic yield of  
70        DNA-based NGS technologies in most studies at 40-50%<sup>6,7</sup>. This is mainly caused by  
71        the absence of pathogenic or likely pathogenic variants in known disease-causing genes,  
72        finding instead variants of unknown significance (VUS) or variants in novel genes not  
73        previously associated with the disease.

74 In this scenario of rare and complex genetic disorders where a diagnosis is not reached  
75 or a prognosis is not accurate enough, more sophisticated methods should be applied to  
76 analyze large-scale genomic data. The use of artificial intelligence (AI) and,  
77 particularly, machine learning (ML) algorithms has raised great interest in recent years  
78 due to its potential to uncover complex patterns in genomic data<sup>8</sup>. These ML algorithms  
79 have shown the capacity to learn from and act on large, heterogeneous datasets to  
80 extract new biological insights, improving the accuracy of the diagnosis of RDs<sup>9-12</sup>.

81 Compared to previous reviews in the field of ML and RDs, such as Schaefer *et al.*<sup>9</sup> or  
82 Brasil *et al.*<sup>13</sup>, in this systematic review we used a different approach, investigating the  
83 role of AI/ML algorithms in the diagnosis and prognosis of RDs using genomic data.  
84 The range of options when it comes to choosing a learning algorithm or a DNA-based  
85 NGS technique to address RDs is highly variable. On the one hand, ML methods are  
86 usually divided into two main categories: supervised and unsupervised learning.  
87 Supervised ML algorithms require labeled data to solve mainly regression and  
88 classification tasks, whereas unsupervised ML algorithms address classification tasks  
89 based on unlabeled data by seeking common patterns. The review from Libbrecht *et al.*  
90 describes these algorithms in more detail and provides examples applied to genomic  
91 data<sup>14</sup>. On the other hand, regarding NGS techniques, there are mainly two strategies: a)  
92 to sequence the entirety of the DNA sequence (whole genome sequencing, WGS), or b)  
93 to just sequence some regions of the DNA, such as coding regions (exome sequencing,  
94 ES), or certain disease-causing genes (gene panel). Nevertheless, the raw data generated  
95 in these experiments can be processed in many ways, with different workflows  
96 depending on the aim of the study.

97 This systematic review presents a thorough overview of the existing evidence on the  
98 application of AI/ML algorithms to the diagnosis of RDs using DNA-based sequencing

99 data. We conducted a comprehensive search of the literature and included studies that  
100 used a variety of ML approaches and sequencing data sources in different research  
101 settings. Our analysis focused on the evaluation of trends in the field, the ability of these  
102 approaches to identify genetic variations associated with RDs, and the potential of  
103 AI/ML to improve their diagnosis.

## 104        **2. Methods**

### 105        **2.1. Systematic literature search and data sources**

106        We performed a literature search using PubMed, Web of Science, and Scopus to  
107        identify relevant publications on the use of AI/ML for the diagnosis and prognosis of  
108        RDs using genomic data. We also used citation and hand searching to ensure that  
109        potentially relevant studies were retrieved. The Preferred Reporting Items for  
110        Systematic Reviews and Meta-Analyses (PRISMA) guidelines were followed to design  
111        and perform this systematic review<sup>15</sup>, and its protocol was registered in PROSPERO  
112        (registration number CRD42022360247).

113        A search in the selected databases using the search terms ‘rare AND ("artificial  
114        intelligence" OR "machine learning" OR "deep learning") AND ((exome OR genome  
115        OR panel) AND sequencing)’ and considering publications from 2012 onward resulted  
116        in 296 abstracts. The citation and hand searching resulted in 10 additional records. The  
117        date of the last search was September 29, 2022.

118        The list of abstracts was screened for inclusion using the following inclusion criteria: (i)  
119        an application of AI/ML methods; (ii) a diagnostic or prognosis application using a  
120        DNA-based NGS technique (panel, exome, or genome sequencing); and (iii) an  
121        application to a RD within the orpha.net database. Non-English articles, review articles,  
122        duplicate records, and studies not relevant to any RD or AI/ML were excluded. To  
123        narrow our focus to clinical applications, we excluded animal studies as well as  
124        publications that only reported methodological aspects of AI/ML without presenting  
125        clinical data from the study population. For all articles considered relevant, the full text  
126        was reviewed using the same screening procedure as in the first stage.

## 127        **2.2. Data extraction**

128        All the selected articles were evaluated to gather data on five main aspects: i) study  
129        characteristics and study population (subjects included, RDs studied, study design, use  
130        of secondary data), ii) characteristics of the applied AI/ML techniques (selected ML  
131        model, programming languages used, input data, associated features, feature selection  
132        methods, model evaluation), iii) information about the DNA-based NGS technology  
133        used (type, sample collected, DNA sequencing kit, sequencing platform, read length,  
134        mean coverage), iv) the variant discovery approach (alignment method, used  
135        SNV/Indel/CNVs callers, variant annotation software, variant filtering criteria), and v)  
136        authors (number of authors and institutions involved, authors' countries) and journal  
137        details (name, category, journal impact factor, journal citation indicator).

## 138        **2.3. Data analysis**

139        The data collected from selected articles were summarized and analyzed using a variety  
140        of approaches. Journal Impact Factor (JIF) scores were obtained from the Journal  
141        Citation Report (JCR) database. Bibliometric networks, including data from authors and  
142        abstracts, were constructed and visualized using VOSviewer<sup>16</sup>. Similarly, full-text  
143        articles were analyzed using WordStat 9.0 (Provalis Research, Montreal, Quebec,  
144        Canada) to extract main topics and keywords.

145        Selected articles were divided into “rare neoplastic diseases” and “other rare diseases”  
146        to enable comparisons. AI/ML models were categorized into three categories:  
147        supervised, unsupervised, and deep learning models. Input variables that the model uses  
148        to make predictions (features) were classified in 1) “clinical features”, which include  
149        information about patients' clinical characteristics; 2) “phenotype-related features”,  
150        including data about the association between genes and phenotypes (e.g., Human

151 Phenotype Ontology); 3) “read alignment features”, which include the properties related  
152 to read mapping and sequencing quality; 4) “genotype-related features”, including  
153 details of variants found in patients (e.g., variant allele frequency, count of variants in a  
154 certain gene, length of indel); 5) “sequence region and structural features”, including  
155 information about the region where the variant is located (e.g., gene size, GC content);  
156 6) “network features”, which include details about the pathways in which a particular  
157 gene is involved (e.g., number of pathway, network neighbors); 7)  
158 “evolutionary/pathogenicity features”, which include pathogenicity and evolutionary  
159 conservation scores of variants (e.g., CADD, PolyPhen-2); 8) “gene expression  
160 features”, including data on gene expression; 9) “tissue-specific features”, including  
161 features which are specific for certain types of tissues; and 10) “disease-specific  
162 features”, including features which are specific for certain types of diseases. The co-  
163 occurrence of these features in the datasets used for training AI/ML models was  
164 examined and plotted using UpSetR<sup>17</sup>.

### 165 **3. Results**

#### 166 **3.1. Included studies**

167 The literature search in databases identified 494 studies, with 296 remaining after  
168 removing duplicates (**Supplementary Table 1**). Among them, 93 studies were selected  
169 for full-text review, and 14 were included in the final analysis. In addition, 11 studies  
170 were identified through hand and citation searching. After screening, 8 further studies  
171 met the selection criteria of this systematic review. Thus, 22 studies were included in  
172 the final analysis (**Supplementary Table 2**). **Figure 1** shows the PRISMA flow  
173 diagram for article selection, including the reasons for excluding records.

#### 174 **3.2. Temporal trends and bibliometrics**

175 To assess the temporal trends in the use of AI/ML methods for the diagnosis and  
176 prognosis of RDs using sequencing data, meta-data from included articles was retrieved  
177 (**Supplementary Table 3**). In recent years, we noticed a relative rise in the number of  
178 studies that address this challenge using AI/ML (**Figure 2A**). Most of these articles  
179 were published in journals belonging to the first quartile (90.9%) and within the  
180 “Genetics & Hereditary” JCR category (31.8%) (**Supplementary Figure 1**). It should  
181 be noted that the count for 2022 is based on studies published up to September 29,  
182 2022.

183 A total of 318 authors contributed to the selected articles. The bibliometric analysis  
184 showed a low level of collaboration between authors of different articles, creating 19  
185 clusters where only 3 authors participated in 2 or more articles (**Supplementary Figure**  
186 **2A**). The term co-occurrence analysis of abstracts found 100 relevant terms divided into  
187 3 clusters that summarize the main topics of this research field. These clusters group  
188 together terms mainly associated with genetics (cluster 1), cancer (cluster 2), and  
189 methodology terms (cluster 3) (**Figure 2B**). The most frequently occurring terms in

190 these abstracts were “genetics” (18 occurrences), “machine learning” (15 occurrences)  
191 and “whole-exome sequencing” (10 occurrences). These key terms were also among the  
192 most frequently used terms in the analysis of full-text articles, where terms such as  
193 “random forest” (59.1% of studies), “somatic mutations” (54.5% of studies), or “rare  
194 variants” (54.5% of studies) were also in a significant proportion of studies  
195 (**Supplementary Figure 2B**).

### 196 **3.3. Application areas for AI/ML techniques**

197 The most common disease scenario was rare neoplastic diseases (59%). The remaining  
198 studies investigated different kinds of RDs, such as developmental, neurological, or  
199 circulatory diseases (**Figure 3A**). Exome sequencing was the most used NGS method in  
200 both rare neoplastic diseases (61.5%) and other RDs (55.5%) (**Figure 3B**). Of note,  
201 63.6% (14/22) of the studies employed sequencing data stored in external databases,  
202 primarily The Cancer Genome Atlas (TCGA), but also the Myocardial Genetics  
203 Consortium (MIGEN), or the Undiagnosed Diseases Network (UDN). These studies  
204 showed larger sample sizes than those using their own cohorts (**Supplementary Figure**  
205 **3**), but they also showed higher intra-method variability, as seen by the mixed sample  
206 processing methods they employed (**Supplementary Figure 4**). **Supplementary Table**  
207 **4** summarizes the NGS-related and sequencing data processing methods in detail.

208 Supervised machine learning methods were chosen in 86.3% of the studies, with  
209 Random Forest (RF) being the most employed algorithm within this group (54.5%)  
210 (**Figure 3C**). One study discarded the genetic features after the feature selection  
211 process, and three studies did not describe the selected features in detail, one of which  
212 was due to a commercial interest (**Supplementary Table 5**).

### 213 **3.4. AI/ML in the study of rare genetic diseases**

214 The objectives of AI/ML approaches in the different studies were investigated. It was  
215 found that the primary goal of using AI/ML in rare neoplastic diseases was the  
216 differential diagnosis of patients (5/13), followed by the identification of somatic  
217 mutations when a matched normal tissue was not available (4/13). In contrast, the major  
218 goals in other RDs were to prioritize variants and candidate genes (5/9) and to identify  
219 biallelic or digenic inheritance (3/9). To date, the use of AI/ML for the differential  
220 diagnosis of patients with non-neoplastic diseases is uncommon (1/9) (**Figure 4A**).

221 Looking at the types of instances (labels) and features (attributes) of datasets used for  
222 training these AI/ML models, we found that they were distinctive and different  
223 depending on the goal pursued (**Table 1** and **Figure 4B**). For the differential diagnosis  
224 of patients, most datasets included only features related to the genotype of patients.  
225 These features primarily contained mutational load data for each gene or genomic  
226 window using collapsing methods. Models trained to predict the prognosis of RDs  
227 included clinical features (e.g., sex, age, exposure to certain substances) in addition to  
228 genotype features. The four AI/ML models aimed at finding possible pathogenic  
229 combinations of genes (digenic) or variants (biallelic) shared the usage of features  
230 related to biological networks or pathways (e.g., the associated pathway of each gene in  
231 KEGG or Reactome, network neighbors). Datasets focused on training models for  
232 variant or gene prioritization were distinguished by using features linked to predictors  
233 of variant pathogenicity at protein level and conservation across the genome of different  
234 species. Finally, for the identification of somatic mutations without a matched normal  
235 sample, the AI/ML models combined genotype features (e.g., variant allele frequency)  
236 with characteristics of the genome region where the variant is located (e.g., GC-content)  
237 or sequencing and mapping quality scores (e.g., coverage). **Supplementary Table 6**  
238 contains further information regarding the types of features mentioned above.

239        **3.5. Data and code access for reproducibility**

240        When it comes to studies that define ML models, reproducibility is a key factor. Of the  
241        selected articles, 16 studies (72.7%) provided access to the data used during the  
242        analysis; 3 studies did so only upon data request; and 3 did not explicitly declare in the  
243        text that data were available, one of which was due to commercial confidentiality. In  
244        terms of the code of AI/ML models, 16 studies (72.7%) had made it publicly available.  
245        With respect to the variant discovery approaches, all studies specified the software used  
246        for sequence alignment; 21 studies (95.5%) included information about the variant  
247        calling step; 17 studies (77.3%) did not mention the use of copy number variations  
248        (CNVs) during the analysis, and 3 studies did not state how the variants were annotated.  
249        **Supplementary Table 7** summarizes data availability and reproducibility information.

## 250 **4. Discussion**

251 AI/ML involve the use of algorithms to process and gain insights from data with the aim  
252 of making predictions or decisions that can be applied to a wide range of fields,  
253 including healthcare and genetics. In this systematic review, we have evaluated the  
254 latest developments in AI/ML when it comes to rare genetic conditions and examined  
255 the ways in which the use of DNA sequencing data can improve their diagnosis. In  
256 addition, we have identified some challenges and opportunities for future research in  
257 this area.

### 258 **4.1. Exome sequencing and rare neoplastic diseases as main topics**

259 Although to a lesser extent than in other types of diagnostic methods, such as medical  
260 imaging, AI/ML are increasingly being used in the field of RDs<sup>9,18,19</sup>. This trend was  
261 also found when focusing only on those studies that use DNA sequencing data to  
262 improve the diagnostic process. Through the bibliometric study carried out in this  
263 review, and the subsequent manual analyses, we found that exome sequencing was the  
264 most prevalent sequencing approach in the field, and that rare neoplastic diseases were  
265 the most prevalent clinical scenario. Exome sequencing continues to be a good starting  
266 point for the genetic diagnosis of RDs, as it provides a cost-effective and efficient way  
267 to identify disease-causing variants<sup>20</sup>. However, depending on the specific rare disease  
268 context, genome sequencing may be necessary to provide a complete diagnosis,  
269 including the analysis of non-coding variations, CNVs, or chromosomal  
270 rearrangements<sup>21,22</sup>.

271 Rare neoplastic diseases generally have a worse diagnosis and higher funding  
272 opportunities than other RDs, making them the type of rare disease in which AI/ML are  
273 used the most<sup>19,23</sup>. This is also due to the existence of public databases such as TCGA,

274 which allow researchers to access a large amount of genomic data and use AI/ML  
275 techniques to identify patterns and make predictions<sup>24</sup>. When we analyzed the data on  
276 which these AI/ML models were trained, we saw that many of them (63.6%) were based  
277 on sequencing data from external sources, such as TCGA. These studies showed larger  
278 sample sizes, but also a greater diversity in sequencing technology characteristics such  
279 as read depth, different length of reads or different sequencing kits and platforms.  
280 Mixing sequencing data from different technologies, qualities, and batches can have  
281 several biases that can influence the variant calling results, affecting in turn the results  
282 of downstream analyses, and making difficult to draw accurate conclusions from the  
283 data<sup>25</sup>. The precision when taking clinical decisions must be maximized, so these  
284 studies must have control over these factors<sup>26</sup>. Different studies have shown how to  
285 approach this process<sup>25,27</sup>.

#### 286 **4.2. AI/ML algorithms and feature selection in genetic studies**

287 Most of the methods utilized in the selected studies fall into the category of supervised  
288 learning (86.7%), with RF being the most common algorithm among them (73.7%). RF  
289 algorithm offers a combination of properties that makes it one of the most widely used  
290 and suitable algorithms for the study of genetic variants<sup>28,29</sup>. RF combines multiple  
291 decision trees (forest) that can handle high-dimensional data, capturing interactions and  
292 complex relationships between features by creating random subsets of both, data and  
293 features, at each tree. In addition, RF also allows to compute feature importances, which  
294 can be used to identify the most relevant features for the prediction task, providing  
295 interpretable models<sup>30</sup>. All this makes RF well suited for complex genetic problems and  
296 explains its popularity among the genetic studies.

297 The structure of the dataset is a fundamental and key aspect of any AI/ML model, as it  
298 is the data that the model uses to learn and make predictions. The processes of feature  
299 selection and feature engineering can have a substantial effect on the performance of the  
300 model; hence, it is essential that the final features possess relevance to the problem at  
301 hand<sup>31</sup>. In this systematic review, we have identified the features used by each of the  
302 selected studies and found that these features were specific to each of the objectives  
303 pursued. This insight can be valuable in understanding the current state of research in  
304 the field, and it can serve as a starting point for creating new datasets in future studies.

305 The results suggested that collapsing or burden methods seem to be crucial for setting  
306 up the features of datasets used to train models for the stratification or differential  
307 diagnosis of patients. These methods divide the genome into portions (bins or genes)  
308 and summarize the information contained in these segments into a burden value, which  
309 can be calculated in different ways<sup>32,33</sup>. This approach has shown its usefulness in  
310 finding candidate genes in different complex RDs with both genome and exome  
311 sequencing data<sup>34-36</sup>. Thus, applied to AI/ML tasks, this process helps to decrease the  
312 dimensionality of datasets based on genetic variants by grouping them into one value  
313 per gene or bin, which helps to reduce the curse of dimensionality and improve  
314 interpretability<sup>37</sup>.

315 On the other hand, models focused on predicting patient prognosis integrate clinical  
316 and genomic data to obtain a more complete picture of the patient and assess the risk of  
317 disease progression. Previous studies, particularly in cancer, have shown how this  
318 integration of data provides a more comprehensive and accurate assessment of patient  
319 outcome<sup>38,39</sup>. Alternatively, models aimed at predicting possible pathogenic  
320 combinations of genes use features that summarize the association of these genes with  
321 the biological pathways in which they participate. The use of these features is supported

322 by the fact that digenic diseases are usually caused by variants in genes that are  
323 functionally related and have a common pathway<sup>40,41</sup>.

### 324 **4.3. Future challenges**

325 From the results of this review, we identified some challenges that need to be addressed  
326 in future studies. When we analyzed the type of genomic data used to train the AI/ML  
327 models reviewed, we realized that most of them (77.3%) were based exclusively on  
328 single nucleotide variants or short indels, not including the analysis of CNVs. CNVs are  
329 a significant source of genetic diversity in humans that has remained understudied due  
330 to the difficulty of detection. However, today there are different algorithms for CNV  
331 detection that simplify the task considerably, as well as guidelines that help us to  
332 interpret them<sup>42,43</sup>. This allows the possibility of evaluating its effect on the  
333 pathogenesis and outcome of RD. On the other hand, when we examine the goals  
334 pursued in the analysis of neoplastic RDs, we can see that the differential diagnosis or  
335 stratification of patients stands out above the other objectives. This is totally different in  
336 other RDs, where, in fact, this objective is the least pursued of the 3 objectives  
337 identified, and, therefore, a field where the contribution of genetic variation to the  
338 phenotype is not well understood. The use of AI/ML algorithms on rare disease  
339 sequencing data can support the identification of novel genetic interactions, uncovering  
340 patterns and relationships that may not be immediately apparent and providing a better  
341 understanding of the regulatory mechanisms mediated by these variants in the  
342 phenotype. The use of unsupervised methods would be a possible first approach to  
343 achieve the objective of identifying clusters of patients according to their genetic  
344 background<sup>44</sup>.

### 345 **4.4. Limitations**

346 Our review is limited by the design of the systematic search and the exclusion of purely  
347 methodological articles, focusing only on those studies with clinical applications.  
348 Because of the limited number of studies available on the topic, and although it has  
349 been studied, articles have not been discarded because of the quality of the journal in  
350 which they were published (i.e., JIF), and this may have influenced, in some way, the  
351 results of this review. In addition, to reduce variability in study methodology and  
352 facilitate the analysis, we have only focused on those studies using DNA-based  
353 sequencing, not including other NGS methodologies such as RNA-seq, which are  
354 widely used in conjunction with AI/ML methodologies<sup>45-47</sup>.

## 355 **5. Conclusions**

356 We have conducted a systematic review of ML algorithms to the diagnosis of RDs  
357 using DNA-based sequencing data, providing an overview of the current state of the  
358 field and the potential of these methods to improve diagnostic accuracy. Exome  
359 sequencing is the most widely used sequencing technology and rare neoplastic diseases  
360 are the most common disease scenario. On the other hand, the goals of AI/ML  
361 algorithms in RDs using sequencing data are broad, ranging from patient stratification  
362 to the identification of possible pathogenic combinations of variants. However, we  
363 found common patterns in these goals when configuring the datasets with which these  
364 models are trained, identifying key features for each of the objectives. Finally, we  
365 identified possible future challenges, such as the use of CNV to train the AI/ML  
366 models, or the application of AI/ML for the stratification of patients with non-neoplastic  
367 RDs. Thus, this systematic review can be used as a reference for further studies,  
368 supporting the development of future ML models in the diagnosis of rare genetic  
369 diseases

## 370        **6. Fundings**

371        JALE has received funds from Instituto de Salud Carlos III (Grant# PI20-1126),  
372        CIBERER (Grant# PIT21\_GCV21), Andalusian University, Research and Innovation  
373        Department (PY20-00303, EPIMEN), Andalusian Health Department (Grant# PI027-  
374        2020), Asociación Síndrome de Meniere España (ASMES) and Meniere's Society, UK.  
375        PRNV is supported by PY20-00303 Grant (EPIMEN). AMPP is a PhD student in the  
376        Biomedicine Program at Universidad de Granada and his salary was supported by  
377        Andalusian University, Research and Innovation Department (Grant#  
378        PREDOC2021/00343).

## 379        **7. Declaration of Competing Interest**

380        The authors declare that they have no competing interests. The research was conducted  
381        independent of any commercial or financial relationships that could be construed as a  
382        potential conflict of interest.

## 383 8. References

- 384 1. Richter T, Nestler-Parr S, Babela R, et al. Rare Disease Terminology and Definitions—A  
385 Systematic Global Review: Report of the ISPOR Rare Disease Special Interest Group. *Value*  
386 *Health*. 2015;18(6):906-914. doi:10.1016/j.jval.2015.05.008
- 387 2. Orphadata: Free access data from Orphanet. © INSERM 1999. Available on  
388 <http://www.orphadata.org>. Data version (XML data version).
- 389 3. Nguengang Wakap S, Lambert DM, Olry A, et al. Estimating cumulative point prevalence of  
390 rare diseases: analysis of the Orphanet database. *Eur J Hum Genet*. 2020;28(2):165-173.  
391 doi:10.1038/s41431-019-0508-0
- 392 4. 100,000 Genomes Project Pilot Investigators, Smedley D, Smith KR, et al. 100,000  
393 Genomes Pilot on Rare-Disease Diagnosis in Health Care - Preliminary Report. *N Engl J*  
394 *Med*. 2021;385(20):1868-1880. doi:10.1056/NEJMoa2035790
- 395 5. Wise AL, Manolio TA, Mensah GA, et al. Genomic Medicine for Undiagnosed Diseases.  
396 *Lancet Lond Engl*. 2019;394(10197):533-540. doi:10.1016/S0140-6736(19)31274-7
- 397 6. Vinkšl M, Writzl K, Maver A, Peterlin B. Improving diagnostics of rare genetic diseases  
398 with NGS approaches. *J Community Genet*. 2021;12(2):247-256. doi:10.1007/s12687-020-  
399 00500-5
- 400 7. Dai P, Honda A, Ewans L, et al. Recommendations for next generation sequencing data  
401 reanalysis of unsolved cases with suspected Mendelian disorders: A systematic review and  
402 meta-analysis. *Genet Med*. Published online May 14, 2022. doi:10.1016/j.gim.2022.04.021
- 403 8. Routhier E, Mozziconacci J. Genomics enters the deep learning era. *PeerJ*.  
404 2022;10:e13613. doi:10.7717/peerj.13613
- 405 9. Schaefer J, Lehne M, Schepers J, Prasser F, Thun S. The use of machine learning in rare  
406 diseases: a scoping review. *Orphanet J Rare Dis*. 2020;15(1):145. doi:10.1186/s13023-020-  
407 01424-6
- 408 10. Setty ST, Scott-Boyer MP, Cuppens T, Droit A. New Developments and Possibilities in  
409 Reanalysis and Reinterpretation of Whole Exome Sequencing Datasets for Unsolved Rare  
410 Diseases Using Machine Learning Approaches. *Int J Mol Sci*. 2022;23(12):6792.  
411 doi:10.3390/ijms23126792
- 412 11. Cohen ASA, Farrow EG, Abdelmoity AT, et al. Genomic answers for children: Dynamic  
413 analyses of >1000 pediatric rare disease genomes. *Genet Med Off J Am Coll Med Genet*.  
414 2022;24(6):1336-1348. doi:10.1016/j.gim.2022.02.007
- 415 12. Okazaki A, Ott J. Machine learning approaches to explore digenic inheritance. *Trends*  
416 *Genet TIG*. Published online May 14, 2022;S0168-9525(22)00105-6.  
417 doi:10.1016/j.tig.2022.04.009
- 418 13. Brasil S, Pascoal C, Francisco R, dos Reis Ferreira V, A. Videira P, Valadão G. Artificial  
419 Intelligence (AI) in Rare Diseases: Is the Future Brighter? *Genes*. 2019;10(12):978.  
420 doi:10.3390/genes10120978

- 421 14. Libbrecht MW, Noble WS. Machine learning applications in genetics and genomics. *Nat*  
422 *Rev Genet.* 2015;16(6):321-332. doi:10.1038/nrg3920
- 423 15. Page MJ, McKenzie JE, Bossuyt PM, et al. The PRISMA 2020 statement: An updated  
424 guideline for reporting systematic reviews. *PLOS Med.* 2021;18(3):e1003583.  
425 doi:10.1371/journal.pmed.1003583
- 426 16. van Eck NJ, Waltman L. Software survey: VOSviewer, a computer program for bibliometric  
427 mapping. *Scientometrics.* 2010;84(2):523-538. doi:10.1007/s11192-009-0146-3
- 428 17. Lex A, Gehlenborg N, Strobel H, Vuillemot R, Pfister H. UpSet: Visualization of Intersecting  
429 Sets. *IEEE Trans Vis Comput Graph.* 2014;20(12):1983-1992.  
430 doi:10.1109/TVCG.2014.2346248
- 431 18. Oren O, Gersh BJ, Bhatt DL. Artificial intelligence in medical imaging: switching from  
432 radiographic pathological data to clinically meaningful endpoints. *Lancet Digit Health.*  
433 2020;2(9):e486-e488. doi:10.1016/S2589-7500(20)30160-6
- 434 19. Lee J, Liu C, Kim J, et al. Deep learning for rare disease: A scoping review. *J Biomed Inform.*  
435 2022;135:104227. doi:10.1016/j.jbi.2022.104227
- 436 20. Klau J, Abou Jamra R, Radtke M, et al. Exome first approach to reduce diagnostic costs and  
437 time – retrospective analysis of 111 individuals with rare neurodevelopmental disorders.  
438 *Eur J Hum Genet.* 2022;30(1):117-125. doi:10.1038/s41431-021-00981-z
- 439 21. Marwaha S, Knowles JW, Ashley EA. A guide for the diagnosis of rare and undiagnosed  
440 disease: beyond the exome. *Genome Med.* 2022;14(1):23. doi:10.1186/s13073-022-01026-  
441 w
- 442 22. Souche E, Beltran S, Brosens E, et al. Recommendations for whole genome sequencing in  
443 diagnostics for rare diseases. *Eur J Hum Genet.* 2022;30(9):1017-1021.  
444 doi:10.1038/s41431-022-01113-x
- 445 23. Dlamini Z, Francies FZ, Hull R, Marima R. Artificial intelligence (AI) and big data in cancer  
446 and precision oncology. *Comput Struct Biotechnol J.* 2020;18:2300-2311.  
447 doi:10.1016/j.csbj.2020.08.019
- 448 24. Weinstein JN, Collisson EA, Mills GB, et al. The Cancer Genome Atlas Pan-Cancer Analysis  
449 Project. *Nat Genet.* 2013;45(10):1113-1120. doi:10.1038/ng.2764
- 450 25. De-Kayne R, Frei D, Greenway R, Mendes SL, Retel C, Feulner PGD. Sequencing platform  
451 shifts provide opportunities but pose challenges for combining genomic data sets. *Mol*  
452 *Ecol Resour.* 2021;21(3):653-660. doi:10.1111/1755-0998.13309
- 453 26. Goldfeder RL, Priest JR, Zook JM, et al. Medical implications of technical accuracy in  
454 genome sequencing. *Genome Med.* 2016;8(1):24. doi:10.1186/s13073-016-0269-0
- 455 27. Ellrott K, Bailey MH, Saksena G, et al. Scalable Open Science Approach for Mutation Calling  
456 of Tumor Exomes Using Multiple Genomic Pipelines. *Cell Syst.* 2018;6(3):271-281.e7.  
457 doi:10.1016/j.cels.2018.03.002
- 458 28. Goldstein BA, Polley EC, Briggs FBS. Random Forests for Genetic Association Studies. *Stat*  
459 *Appl Genet Mol Biol.* 2011;10(1):32. doi:10.2202/1544-6115.1691

- 460 29. Chen X, Ishwaran H. Random Forests for Genomic Data Analysis. *Genomics*.  
461 2012;99(6):323-329. doi:10.1016/j.ygeno.2012.04.003
- 462 30. Breiman L. Random Forests. *Mach Learn*. 2001;45(1):5-32. doi:10.1023/A:1010933404324
- 463 31. Pudjihartono N, Fadason T, Kempa-Liehr AW, O'Sullivan JM. A Review of Feature Selection  
464 Methods for Machine Learning-Based Disease Risk Prediction. *Front Bioinforma*. 2022;2.  
465 Accessed January 21, 2023.  
466 <https://www.frontiersin.org/articles/10.3389/fbinf.2022.927312>
- 467 32. Dering C, König IR, Ramsey LB, Relling MV, Yang W, Ziegler A. A comprehensive evaluation of  
468 collapsing methods using simulated and real data: excellent annotation of functionality  
469 and large sample sizes required. *Front Genet*. 2014;5. Accessed January 21, 2023.  
470 <https://www.frontiersin.org/articles/10.3389/fgene.2014.00323>
- 471 33. Nicolae DL. Association Tests for Rare Variants. *Annu Rev Genomics Hum Genet*.  
472 2016;17(1):117-130. doi:10.1146/annurev-genom-083115-022609
- 473 34. Roman-Naranjo P, Gallego-Martinez A, Soto-Varela A, et al. Burden of Rare Variants in the  
474 OTOG Gene in Familial Meniere's Disease. *Ear Hear*. 2020;41(6):1598-1605.  
475 doi:10.1097/AUD.0000000000000878
- 476 35. Dillioott AA, Abdelhady A, Sunderland KM, et al. Contribution of rare variant associations to  
477 neurodegenerative disease presentation. *NPJ Genomic Med*. 2021;6:80.  
478 doi:10.1038/s41525-021-00243-3
- 479 36. Lin J, Li C, Cui Y, et al. Rare variants in IMPDH2 cause autosomal dominant dystonia in  
480 Chinese population. *J Neurol*. Published online January 17, 2023. doi:10.1007/s00415-023-  
481 11564-x
- 482 37. Altman N, Krzywinski M. The curse(s) of dimensionality. *Nat Methods*. 2018;15(6):399-400.  
483 doi:10.1038/s41592-018-0019-x
- 484 38. Lobato-Delgado B, Priego-Torres B, Sanchez-Morillo D. Combining Molecular, Imaging, and  
485 Clinical Data Analysis for Predicting Cancer Prognosis. *Cancers*. 2022;14(13):3215.  
486 doi:10.3390/cancers14133215
- 487 39. Gonzalez-Bosquet J, Gabrilovich S, McDonald ME, et al. Integration of Genomic and Clinical  
488 Retrospective Data to Predict Endometrioid Endometrial Cancer Recurrence. *Int J Mol Sci*.  
489 2022;23(24):16014. doi:10.3390/ijms232416014
- 490 40. Gazzo A, Raimondi D, Daneels D, et al. Understanding mutational effects in digenic  
491 diseases. *Nucleic Acids Res*. 2017;45(15):e140. doi:10.1093/nar/gkx557
- 492 41. Schäffer AA. Digenic inheritance in medical genetics. *J Med Genet*. 2013;50(10):641-652.  
493 doi:10.1136/jmedgenet-2013-101713
- 494 42. Riggs ER, Andersen EF, Cherry AM, et al. Technical standards for the interpretation and  
495 reporting of constitutional copy-number variants: a joint consensus recommendation of  
496 the American College of Medical Genetics and Genomics (ACMG) and the Clinical Genome  
497 Resource (ClinGen). *Genet Med*. 2020;22(2):245-257. doi:10.1038/s41436-019-0686-8

- 498 43. Gordeeva V, Sharova E, Arapidi G. Progress in Methods for Copy Number Variation  
499 Profiling. *Int J Mol Sci*. 2022;23(4):2143. doi:10.3390/ijms23042143
- 500 44. Basile AO, Ritchie MD. Informatics and Machine Learning to Define the Phenotype. *Expert*  
501 *Rev Mol Diagn*. 2018;18(3):219-226. doi:10.1080/14737159.2018.1439380
- 502 45. Wang L, Xi Y, Sung S, Qiao H. RNA-seq assistant: machine learning based methods to  
503 identify more transcriptional regulated genes. *BMC Genomics*. 2018;19(1):546.  
504 doi:10.1186/s12864-018-4932-2
- 505 46. Gunavathi C, Sivasubramanian K, Keerthika P, Paramasivam C. A review on convolutional  
506 neural network based deep learning methods in gene expression data for disease  
507 diagnosis. *Mater Today Proc*. 2021;45:2282-2285. doi:10.1016/j.matpr.2020.10.263
- 508 47. Figgett WA, Monaghan K, Ng M, et al. Machine learning applied to whole-blood RNA-  
509 sequencing data uncovers distinct subsets of patients with systemic lupus erythematosus.  
510 *Clin Transl Immunol*. 2019;8(12):e01093. doi:10.1002/cti2.1093
- 511 48. Parida L, Haferlach C, Rhrissorrakrai K, et al. Dark-matter matters: Discriminating subtle  
512 blood cancers using the darkest DNA. *PLoS Comput Biol*. 2019;15(8):e1007332.  
513 doi:10.1371/journal.pcbi.1007332
- 514 49. Parvande S, Donehower LA, Panagiotis K, et al. EPIMUTESTR: a nearest neighbor machine  
515 learning approach to predict cancer driver genes from the evolutionary action of coding  
516 variants. *Nucleic Acids Res*. 2022;50(12):e70. doi:10.1093/nar/gkac215
- 517 50. Peneder P, Stütz AM, Surdez D, et al. Multimodal analysis of cell-free DNA whole-genome  
518 sequencing for pediatric cancers with low mutational burden. *Nat Commun*.  
519 2021;12(1):3230. doi:10.1038/s41467-021-23445-w
- 520 51. Li Y, Luo Y. Performance-weighted-voting model: An ensemble machine learning method  
521 for cancer type classification using whole-exome sequencing mutation. *Quant Biol Beijing*  
522 *China*. 2020;8(4):347-358. doi:10.1007/s40484-020-0226-1
- 523 52. Aguiar-Pulido V, Wolujewicz P, Martinez-Fundichely A, et al. Systems biology analysis of  
524 human genomes points to key pathways conferring spina bifida risk. *Proc Natl Acad Sci U S*  
525 *A*. 2021;118(51):e2106844118. doi:10.1073/pnas.2106844118
- 526 53. Chaix MA, Parmar N, Kinnear C, et al. Machine Learning Identifies Clinical and Genetic  
527 Factors Associated With Anthracycline Cardiotoxicity in Pediatric Cancer Survivors. *JACC*  
528 *CardioOncology*. 2020;2(5):690-706. doi:10.1016/j.jacc.2020.11.004
- 529 54. Zauderer MG, Martin A, Egger J, et al. The use of a next-generation sequencing-derived  
530 machine-learning risk-prediction model (OncoCast-MPM) for malignant pleural  
531 mesothelioma: a retrospective study. *Lancet Digit Health*. 2021;3(9):e565-e576.  
532 doi:10.1016/S2589-7500(21)00104-7
- 533 55. Carter H, Douville C, Stenson PD, Cooper DN, Karchin R. Identifying Mendelian disease  
534 genes with the variant effect scoring tool. *BMC Genomics*. 2013;14 Suppl 3:S3.  
535 doi:10.1186/1471-2164-14-S3-S3

- 536 56. Vitsios D, Petrovski S. Mantis-ml: Disease-Agnostic Gene Prioritization from High-  
537 Throughput Genomic Screens by Stochastic Semi-supervised Learning. *Am J Hum Genet.*  
538 2020;106(5):659-678. doi:10.1016/j.ajhg.2020.03.012
- 539 57. Majithia AR, Tsuda B, Agostini M, et al. Prospective functional classification of all possible  
540 missense variants in PPARG. *Nat Genet.* 2016;48(12):1570-1575. doi:10.1038/ng.3700
- 541 58. Carss KJ, Baranowska AA, Armisen J, et al. Spontaneous Coronary Artery Dissection:  
542 Insights on Rare Genetic Variation From Genome Sequencing. *Circ Genomic Precis Med.*  
543 2020;13(6):e003030. doi:10.1161/CIRCGEN.120.003030
- 544 59. Davis NA, Lareau CA, White BC, et al. Encore: Genetic Association Interaction Network  
545 centrality pipeline and application to SLE exome data. *Genet Epidemiol.* 2013;37(6):614-  
546 621. doi:10.1002/gepi.21739
- 547 60. Mukherjee S, Cogan JD, Newman JH, et al. Identifying digenic disease genes via machine  
548 learning in the Undiagnosed Diseases Network. *Am J Hum Genet.* 2021;108(10):1946-1963.  
549 doi:10.1016/j.ajhg.2021.08.010
- 550 61. Laan M, Kasak L, Timinskas K, et al. NR5A1 c.991-1G > C splice-site variant causes familial  
551 46,XY partial gonadal dysgenesis with incomplete penetrance. *Clin Endocrinol (Oxf).*  
552 2021;94(4):656-666. doi:10.1111/cen.14381
- 553 62. Ainscough BJ, Barnell EK, Ronning P, et al. A deep learning approach to automate  
554 refinement of somatic variant calling from cancer sequencing data. *Nat Genet.*  
555 2018;50(12):1735-1743. doi:10.1038/s41588-018-0257-y
- 556 63. Wood DE, White JR, Georgiadis A, et al. A machine learning approach for somatic mutation  
557 discovery. *Sci Transl Med.* 2018;10(457):eaar7939. doi:10.1126/scitranslmed.aar7939
- 558 64. Kalatskaya I, Trinh QM, Spears M, McPherson JD, Bartlett JMS, Stein L. ISOWN: accurate  
559 somatic mutation identification in the absence of normal tissue controls. *Genome Med.*  
560 2017;9(1):59. doi:10.1186/s13073-017-0446-9
- 561

## 562 **Figures**

563 **Figure 1:** PRISMA flow diagram for the identification, screening and selection of  
564 genetic studies using AI/ML for the diagnosis of rare diseases.

565 **Figure 2:** Visualization of temporal trends and bibliometrics. Panel **A)** shows the  
566 selected studies distributed per year and divided into deciles (**D**) according to journal  
567 impact factors (**JIF**). Panel **B)** displays a keyword co-occurrence network using abstracts  
568 of selected studies.

569 **Figure 3:** Methods and areas of application. Panel **A)** displays the distribution of rare  
570 disease identified in selected studies. Panel **B)** shows the next-generation sequencing  
571 (NGS) methods used in studies targeting rare neoplastic diseases and other rare  
572 diseases. Panel **C)** summarizes the types of machine learning algorithms applied in  
573 selected studies.

574 Footer: KNN: K-Nearest Neighbors; LDA: Linear Discriminant Analysis; FNN:  
575 Feedforward neural network; CNN: Convolutional Neural Networks.

576 **Figure 4:** Objectives and settings of AI/ML models. Panel **A)** displays the goals of  
577 AI/ML models in rare neoplastic diseases (blue) and other rare diseases (orange). Panel  
578 **B)** contains an upset plot showing the different combinations of features in the training  
579 datasets of AI/ML models depending on the objective pursued.

580 **Table**

581 **Table 1:** Distinctive features identified in the datasets used for training the ML models of included studies, based on the specific goal being

| Objective AI/ML algorithm                        | Type of instances      | Distinctive dataset feature/s | Example of feature        | Use cases (ref) |
|--------------------------------------------------|------------------------|-------------------------------|---------------------------|-----------------|
| Stratification/Differential diagnosis            | Patients               | Genotype features             | Burden value              | [48–52]         |
| Prognosis of patients                            | Patients               | Genotype + Clinical features  | Burden value + age        | [53,54]         |
| Variant/Gene prioritization                      | Genes/variants         | Pathogenicity features        | CADD score                | [55–58]         |
| Identification of digenic/biallelic combinations | Pair of genes/variants | Network features              | Number of pathways shared | [59–61]         |
| Identification of somatic mutations              | Variants               | Genotype + Sequence features  | VAF + GC-content          | [62–64]         |

582 pursued.

583 CADD: Combined Annotation Dependent Depletion; VAF: Variant allelic frequency

**Identification of studies via databases and registers**

**Identification of studies via other methods**

**Identification**



**Screening**



**Included**





**A****B****C**

**A****B**
