# Supplementary material for: A systematic review on machine learning approaches in the diagnosis of rare genetic diseases
Source: bioRxiv or medRxiv preprint supplement (doi:10.1101/2023.01.30.23285203), 2023-01-31

## Supplementary Figures

---

### *A systematic review on machine learning approaches in the diagnosis of rare genetic diseases*

---

Roman-Naranjo P<sup>1,2,3</sup>, Parra-Perez AM<sup>1,2,3,4</sup>, Lopez-Escamez JA<sup>1,2,3,4</sup>

<sup>1</sup>Otology and Neurotology Group CTS495, Department of Genomic Medicine, GENYO - Centre for Genomics and Oncological Research - Pfizer, University of Granada, Junta de Andalucía, PTS, Granada, Spain.

<sup>2</sup>Division of Otolaryngology, Department of Surgery, Instituto de Investigación Biosanitaria, ibs.GRANADA, Granada, Universidad de Granada, Granada, Spain.

<sup>3</sup>Sensorineural Pathology Programme, Centro de Investigación Biomédica en Red en Enfermedades Raras, CIBERER, Madrid, Spain

<sup>4</sup>Meniere's Disease Neuroscience Research Program, Faculty of Medicine & Health, School of Medical Sciences, The Kolling Institute, University of Sydney, Sydney, New South Wales, Australia

**Supplementary Figure 1: Category and journal where selected articles were published.**

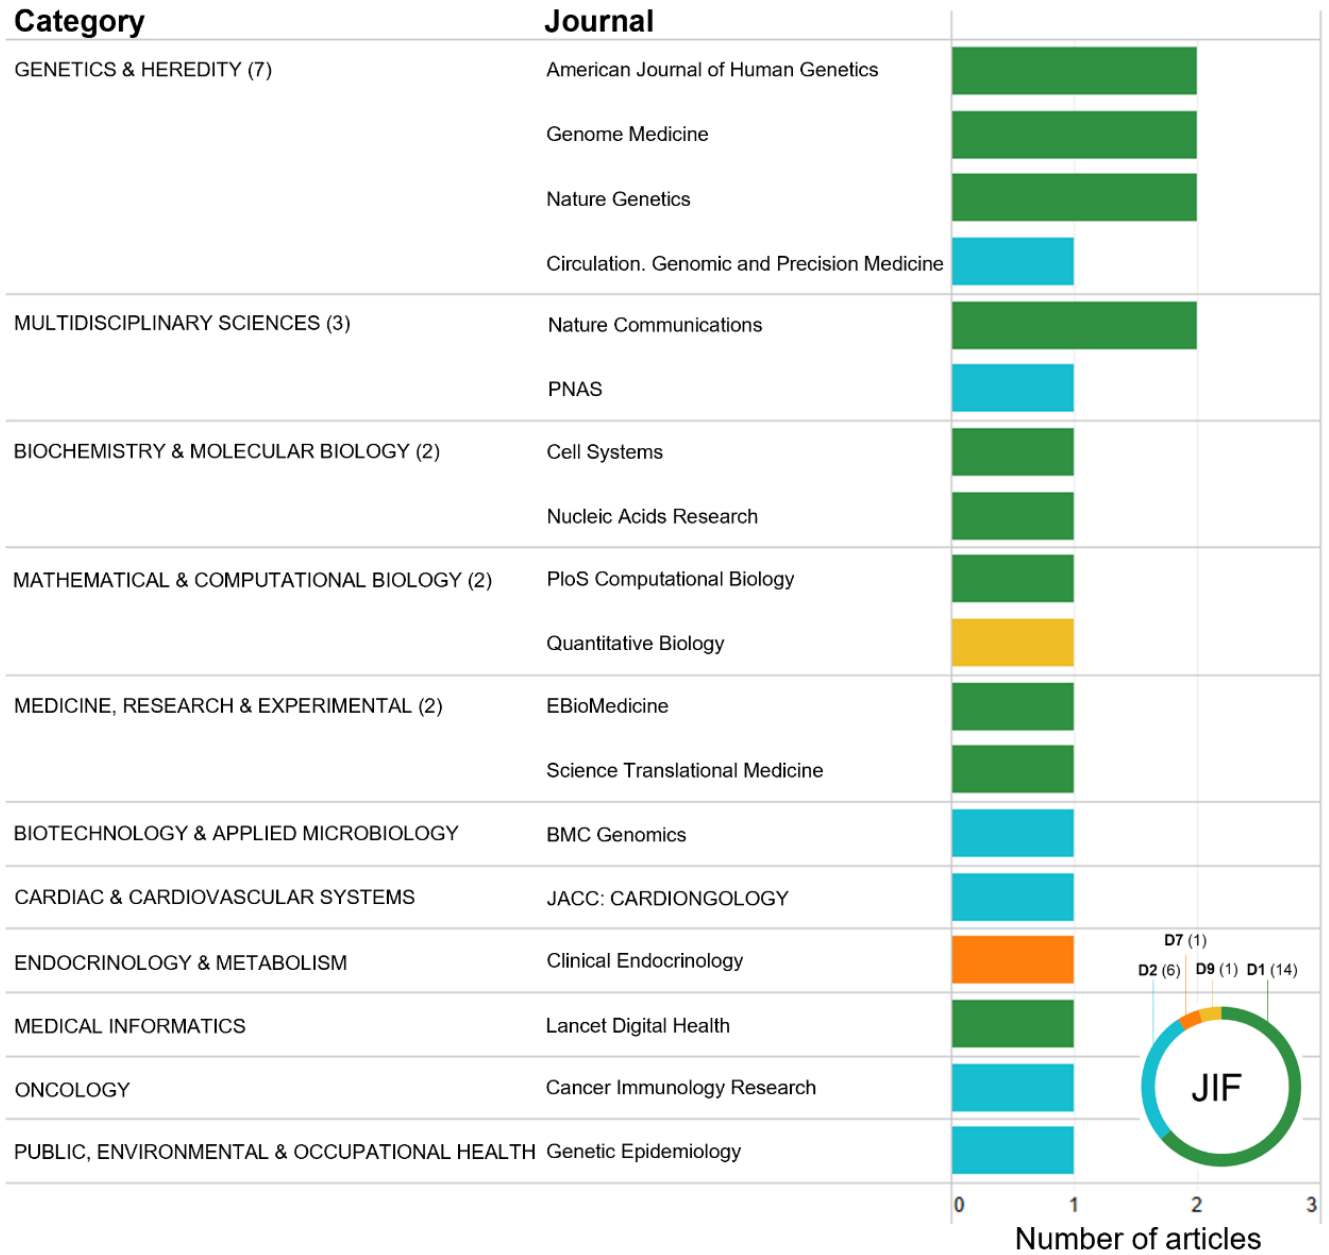

JIF: Journal Impact Factor



**Supplementary Figure 3: Sample sizes of studies using A) their own cohorts and B) external cohorts.**

**A**

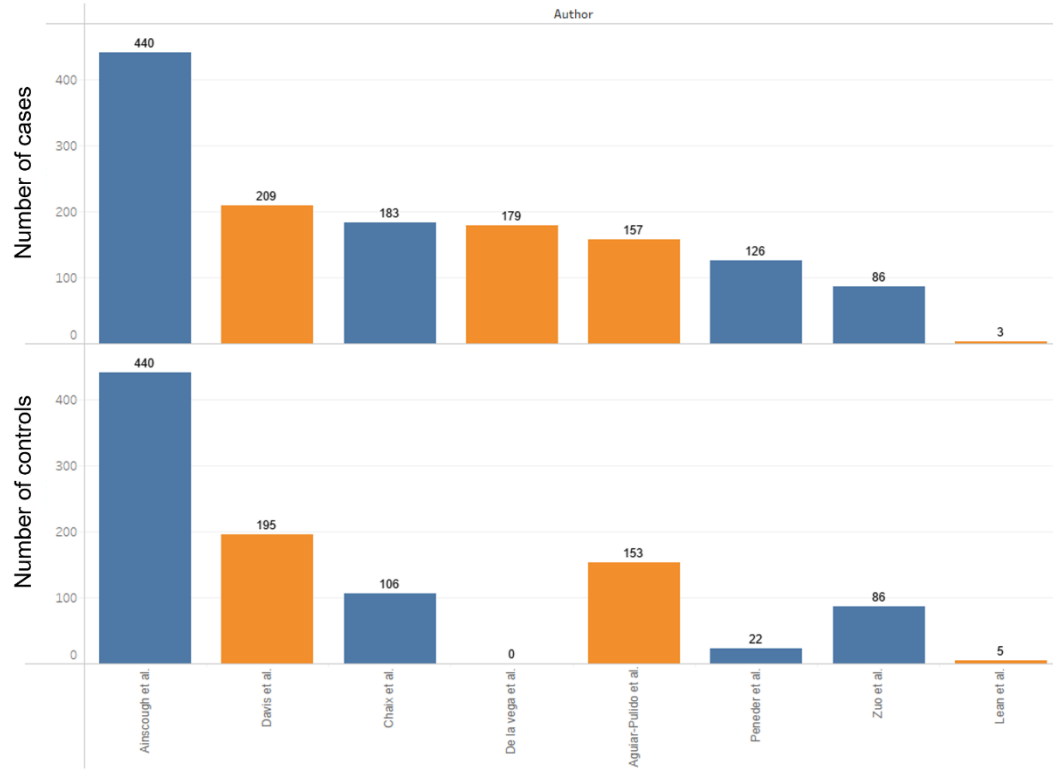

**B**

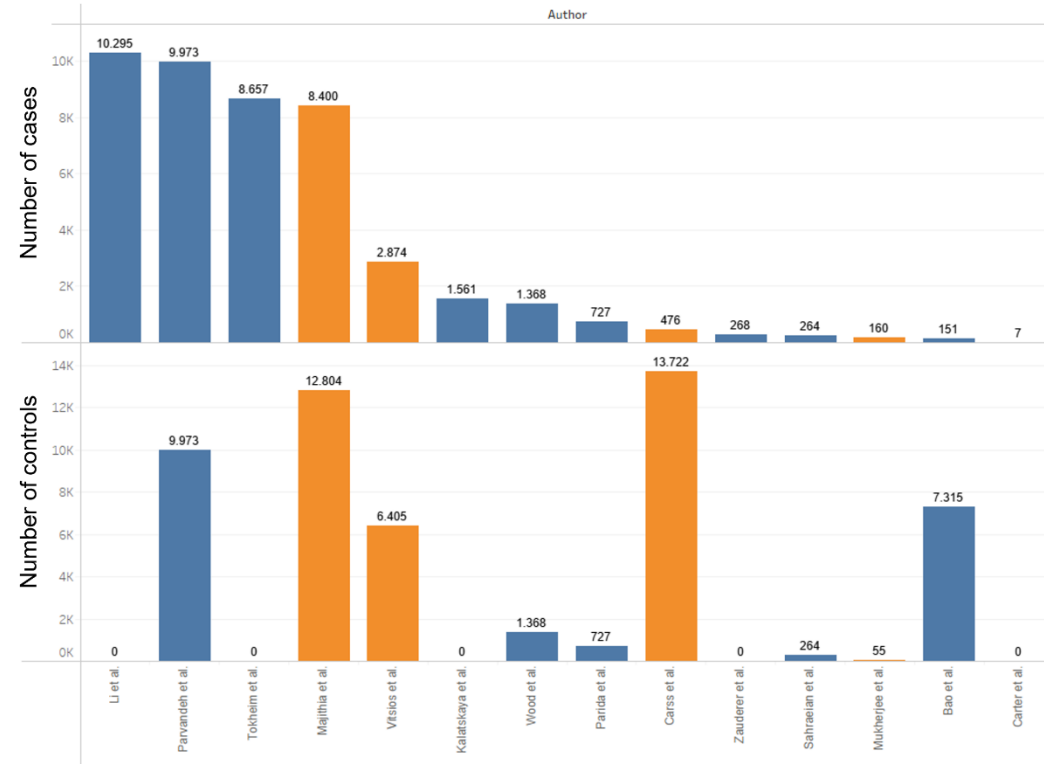

**Supplementary Figure 4:** Studies using external cohorts showed higher variability in their methods, using different sequencing platforms, read lengths and variant callers in the same study.

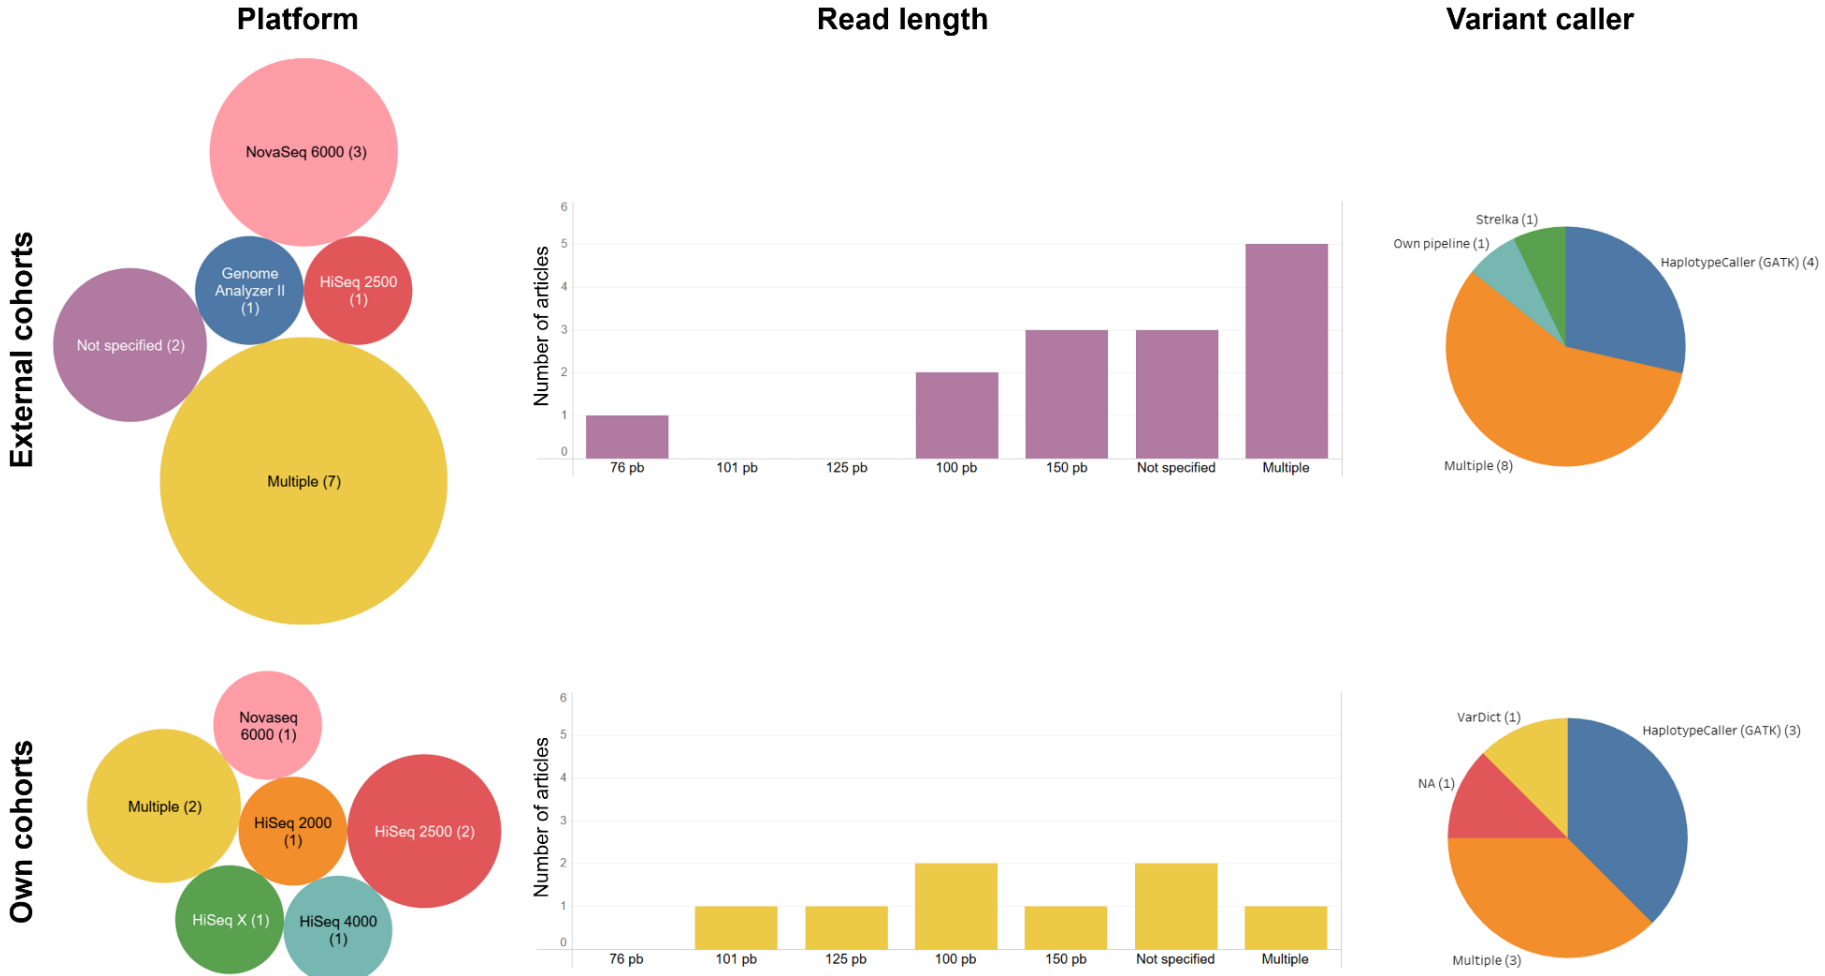

Supplement: Supplementary file [file media-1.pdf]
